# Supplementary material
Source: publisher site journal article supplement (https://www.dovepress.com/article/559130)
Supplement: Supplementary file 1 [file 559130-Supplementary%20materials_1_1.docx]

**Table S1** Baseline characteristics comparison between inclusion and exclusion groups

| Characteristics | All participants | Inclusion | Exclusion | *χ*2*/t* | *P* |
| --- | --- | --- | --- | --- | --- |
| 1, 820 (100%) | 1, 081 (73.9%) | 739 (26.1%) |
| Sex (Male), n (%) | 751 (41.3%) | 449 (41.5%) | 302 (40.9%) | 0.081 | 0.776 |
| Age, x̄ ± s | 70.50 ± 5.51 | 70.52 ± 5.55 | 70.47 ± 5.45 | 0.167 | 0.867 |
| Education, x̄ ± s | 12.01 ± 3.30 | 12.04 ± 3.29 | 11.96 ± 3.30 | 0.483 | 0.629 |
| Dwelling status (Living alone), n (%) | 185 (10.9%) | 110 (10.9%) | 75 (11.0%) | 0.008 | 0.929 |
| Spouse (Yes), n (%) | 1, 488 (83.5%) | 882 (83.3%) | 606 (83.9%) | 0.180 | 0.914 |
| Monthly income, n (%) | | | | | |
| < CNY 2,000 | 62 (3.5%) | 35 (3.4%) | 27 (3.8%) | 0.488 | 0.784 |
| CNY 2,000 ~ 4,000 | 805 (46.0%) | 474 (45.6%) | 331 (46.6%) |
| > CNY 4,000 (%) | 882 (50.4%) | 530 (51.0%) | 352 (49.6%) |
| BMI, kg/m2, n (%) | | | | | |
| < 18.5 | 68 (4.0%) | 41 (4.0%) | 27 (3.9%) | 0.688 | 0.876 |
| 18.5 ≤ BMI ＜ 24 | 778 (45.7%) | 470 (46.4%) | 308 (44.7%) |
| 24 ≤ BMI ＜ 28 | 679 (39.9%) | 396 (39.1%) | 283 (41.1%) |
| ≥ 28 | 177 (10.4%) | 106 (10.5%) | 71 (10.3%) |
| Smoking (Yes), n (%) | 423 (23.8%) | 255 (24.1%) | 168 (23.3%) | 0.156 | 0.693 |
| Drinking (Yes), n (%) | 429 (24.2%) | 253 (24.0%) | 176 (24.5%) | 0.069 | 0.793 |
| Physical activities (Yes), n (%) | 1, 558 (87.9%) | 929 (88.1%) | 629 (87.6%) | 0.082 | 0.775 |
| Intellectual activities (Yes), n (%) | 1, 124 (63.9%) | 674 (64.4%) | 450 (63.2%) | 0.252 | 0.615 |
| Hypertension (Yes), n (%) | 1, 054 (58.7%) | 629 (59.1%) | 425 (58.2%) | 0.096 | 0.757 |
| Diabetes (Yes), n (%) | 455 (25.5%) | 271 (25.6%) | 184 (25.4%) | 0.009 | 0.924 |
| Hyperlipidemia (Yes), n (%) | 612 (34.3%) | 367 (34.7%) | 245 (33.8%) | 0.137 | 0.711 |
| Coronary heart disease (Yes), n (%) | 284 (16.0%) | 173 (16.4%) | 111 (15.4%) | 0.330 | 0.565 |
| Cerebrovascular disease (Yes), n (%) | 187 (10.5%) | 106 (10.1%) | 81 (11.3%) | 0.662 | 0.416 |

**Abbreviations:** BMI, body mass index; CNY, China Yuan.

**Table S2** Missing rate, mechanism assumption, and imputation model for each variable

| Variables | type | miss_pct | pattern | imp_model | imp_function |
| --- | --- | --- | --- | --- | --- |
| Dwelling status | nominal | 6.57 | MAR | Multinomial logit | mice::mice.impute.polyreg() |
| BMI | nominal | 6.29 | MAR | Multinomial logit | mice::mice.impute.polyreg() |
| Monthly income | nominal | 3.89 | MCAR | Multinomial logit | mice::mice.impute.polyreg() |
| Intellectual activities | nominal | 3.15 | MCAR | Multinomial logit | mice::mice.impute.polyreg() |
| Coronary heart disease | nominal | 2.50 | MCAR | Multinomial logit | mice::mice.impute.polyreg() |
| Cerebrovascular disease | nominal | 2.50 | MCAR | Multinomial logit | mice::mice.impute.polyreg() |
| Drinking | nominal | 2.50 | MCAR | Multinomial logit | mice::mice.impute.polyreg() |
| Physical activities | nominal | 2.41 | MCAR | Multinomial logit | mice::mice.impute.polyreg() |
| Diabetes | nominal | 2.13 | MCAR | Multinomial logit | mice::mice.impute.polyreg() |
| Hyperlipidemia | nominal | 2.13 | MCAR | Multinomial logit | mice::mice.impute.polyreg() |
| Spouse | nominal | 2.04 | MCAR | Multinomial logit | mice::mice.impute.polyreg() |
| Smoking | nominal | 2.04 | MCAR | Multinomial logit | mice::mice.impute.polyreg() |
| Hypertension | nominal | 1.30 | MCAR | Multinomial logit | mice::mice.impute.polyreg() |
| Education | continuous | 0.46 | MCAR | Predictive mean matching | mice::mice.impute.pmm() |

**Note:** nominal, categorical variables; continuous, numeric variables.

Missing mechanism: MCAR , missing completely at random (Little’s test p≥0.05 or no association with observed covariates); MAR, missing at random (p< 0.05 or significant association with observed covariates).

Imp_model abbreviations: Multinomial logit, multinomial logistic regression; Predictive mean matching, donor-based matching for continuous variables. Function names refer to specific mice imputation methods (polyreg for nominal, pmm for continuous).

**Table S3** Correlation analysis of PF indices and RMS indices

| r | PEF | FEV1 | FVC | MIP | MEP |
| --- | --- | --- | --- | --- | --- |
| PEF | 1 |  |  |  |  |
| FEV1 | 0.682** | 1 |  |  |  |
| FVC | 0.450** | 0.805** | 1 |  |  |
| MIP | 0.567** | 0.550** | 0.442** | 1 |  |
| MEP | 0.932** | 0.671** | 0.448** | 0.585** | 1 |

**Note:**All continuous variables ( PEF, FEV1, FVC, MIP and MEP) were included in the analysis after being standardized by z-score. ** indicate statistical significance at p < 0.001.

**Abbreviations:** PF, pulmonary function; RMS, respiratory muscle strength; PEF, peak expiratory flow; FEV1, forced expiratory volume in one second; FVC, forced vital capacity; MIP, maximal inspiratory pressure; MEP; maximum expiratory pressure.

**Table S4** Collinearity analysis of PF indices and RMS indices with cognitive function

|  |  | *β* | *SE* | *t* | *P* | Tolerance | VIF |
| --- | --- | --- | --- | --- | --- | --- | --- |
| Model 1 | PEF | -0.033 | 0.085 | -0.393 | 0.695 | 0.124 | 8.057 |
| FEV1 | -0.041 | 0.064 | -0.643 | 0.520 | 0.219 | 4.561 |
| FVC | 0.135 | 0.052 | 2.597 | **0.010** | 0.332 | 3.013 |
| MIP | -0.083 | 0.038 | -2.174 | **0.030** | 0.609 | 1.641 |
| MEP | 0.224 | 0.084 | 2.656 | **0.008** | 0.125 | 7.986 |
| Model 2 | c-PF | 0.143 | 0.057 | 2.508 | **0.012** | 0.360 | 2.781 |
| MIP | -0.083 | 0.038 | -2.179 | **0.030** | 0.610 | 1.638 |
| MEP | 0.128 | 0.049 | 2.594 | **0.010** | 0.366 | 2.732 |
| Model 3 | c-PF | 0.200 | 0.054 | 3.688 | **＜0.001** | 0.402 | 2.486 |
| c-RMS | 0.002 | 0.053 | 0.033 | 0.974 | 0.402 | 2.486 |

**Note:**All continuous variables ( PEF, FEV1, FVC, MIP and MEP) were included in the analysis after being standardized by z-score. Bold values indicate statistical significance at p < 0.05.

**Abbreviations:** PEF, peak expiratory flow; FEV1, forced expiratory volume in one second; FVC, forced vital capacity; MEP, maximum expiratory pressure; MIP, maximal inspiratory pressure; VIF, variance inflation factor; c-PF, comprehensive pulmonary function; c-RMS, comprehensive respiratory muscle strength.

**Table S5** Association of PF indices with cognitive function by general linear regression model

|  | *β* | 95%*CI* | *t* | *P* |
| --- | --- | --- | --- | --- |
| Z-Global | | | | |
| PEF | 0.147 | （0.083，0.211） | 4.500 | **＜0.001** |
| FEV1 | 0.110 | （0.037，0.183） | 2.961 | **0.003** |
| FVC | 0.113 | （0.043，0.183） | 3.167 | **0.002** |
| Z-Memory | | | | |
| PEF | 0.108 | （0.045，0.172） | 3.348 | **0.001** |
| FEV1 | 0.073 | （0.001，0.146） | 1.979 | **0.048** |
| FVC | 0.054 | （-0.016，0.124） | 1.516 | 0.130 |
| Z-Language | | | | |
| PEF | 0.102 | （0.031，0.173） | 2.832 | **0.005** |
| FEV1 | 0.084 | （0.004，0.165） | 2.065 | **0.039** |
| FVC | 0.086 | （0.010，0.162） | 2.211 | **0.027** |
| Z-Attention | | | | |
| PEF | 0.064 | （0.006，0.121） | 2.179 | **0.030** |
| FEV1 | 0.044 | （-0.021，0.109） | 1.318 | 0.188 |
| FVC | 0.051 | （-0.011，0.113） | 1.603 | 0.109 |
| Z-Execution | | | | |
| PEF | 0.126 | （0.058，0.193） | 3.664 | **＜0.001** |
| FEV1 | 0.111 | （0.035，0.187） | 2.853 | **0.004** |
| FVC | 0.129 | （0.057，0.201） | 3.513 | **＜0.001** |

**Note:**All continuous variables ( PEF, FEV1 and FVC) were included in the analysis after being standardized by z-score. Bold values indicate statistical significance at p < 0.05. Adjusted for baseline age, sex, education, monthly income, spouse, dwelling status, smoking, drinking, BMI, physical activities, intellectual activities, hypertension, diabetes, hyperlipidemia, coronary heart disease and cerebrovascular diseases.

**Abbreviations:** FEV1, forced expiratory volume in one second; FVC, forced vital capacity; PEF, peak expiratory flow; Z-, standardized score.

**Table S6** PF combined with APOE status is associated with global cognitive function.

| Group A | Group B | Mean difference a | *SE* | *P* |
| --- | --- | --- | --- | --- |
| Normal PF with non-APOE Ɛ4 | Normal PF with APOE Ɛ4 | 0.106 | 0.089 | 0.237 |
| Abnormal PF with non-APOE Ɛ4 | 0.179 | 0.070 | **0.010** |
| Abnormal PF with APOE Ɛ4 | 0.219 | 0.106 | **0.038** |
| Normal PF with APOE Ɛ4 | Abnormal PF with non-APOE Ɛ4 | 0.069 | 0.094 | 0.456 |
| Abnormal PF with APOE Ɛ4 | 0.013 | 0.124 | 0.370 |
| Abnormal PF with non-APOE Ɛ4 | Abnormal PF with APOE Ɛ4 | 0.038 | 0.110 | 0.719 |

**Note:** a Mean difference (MD) represents the unstandardized between-group difference in means (group B – group A), with SE denoting the standard error of MD. Bold values indicate statistical significance at p < 0.05. Adjusted for baseline age, sex, education, monthly income, spouse, dwelling status, smoking, drinking, BMI, physical activities, intellectual activities, hypertension, diabetes, hyperlipidemia, coronary heart disease and cerebrovascular diseases.

**Abbreviations:** APOE Ɛ4, Apolipoprotein Ɛ4; PF, pulmonary function; SE, standard error.

**Table S7** Association between MIP, MEP and cognitive scores and subdomains by the general linear regression model

|  |  | *β* | 95%*CI* | *t* | *P* |
| --- | --- | --- | --- | --- | --- |
| MIP | Z-global | 0.072 | （0.005，0.138） | 2.117 | **0.035** |
| Z-memory | 0.061 | （-0.005，0.127） | 1.816 | 0.070 |
| Z-language | 0.067 | （-0.006，0.140） | 1.802 | 0.072 |
| Z-attention | -0.011 | （-0.070，0.048） | -0.365 | 0.715 |
| Z-execution | 0.091 | （0.021，0.160） | 2.571 | **0.010** |
| MEP | Z-global | 0.164 | （0.100，0.228） | 5.030 | **＜0.001** |
| Z-memory | 0.101 | （0.037，0.164） | 3.085 | **0.002** |
| Z-language | 0.129 | （0.058，0.199） | 3.592 | **＜0.001** |
| Z-attention | 0.062 | （0.004，0.120） | 2.102 | **0.036** |
| Z-execution | 0.162 | （0.095，0.229） | 4.756 | **＜0.001** |

**Note:** All continuous variables (MIP and MEP) were included in the analysis after being standardized by z-score. Bold values indicate statistical significance at p < 0.05. Adjusted for baseline age, sex, education, monthly income, spouse, dwelling status, smoking, drinking, BMI, physical activities, intellectual activities, hypertension, diabetes, hyperlipidemia, coronary heart disease and cerebrovascular diseases.

**Abbreviations:** MIP, maximal inspiratory pressure; MEP, maximum expiratory pressure; Z-, standardized score.

**Table S8** Association between MIP and cognitive scores and domains under sex stratification

|  |  | *β* | 95%*CI* | *t* | *P* |
| --- | --- | --- | --- | --- | --- |
| Male | Z-global | 0.105 | （0.008，0.203） | 2.123 | **0.034** |
| Z-memory | 0.100 | （0.002，0.198） | 1.998 | **0.047** |
| Z-language | 0.145 | （0.022，0.269） | 2.313 | **0.021** |
| Z-attention | 0.003 | （-0.082，0.088） | 0.065 | 0.948 |
| Z-execution | 0.084 | （-0.016，0.184） | 1.650 | 0.100 |
| Female | Z-global | 0.066 | （-0.026，0.158） | 1.406 | 0.160 |
| Z-memory | 0.028 | （-0.063，0.118） | 0.601 | 0.548 |
| Z-language | 0.026 | （-0.066，0.118） | 0.558 | 0.577 |
| Z-attention | -0.015 | （-0.100，0.070） | -0.340 | 0.734 |
| Z-execution | 0.115 | （0.018，0.213） | 2.322 | **0.021** |

**Note:** All continuous variables (MIP) were included in the analysis after being standardized by z-score. Bold values indicate statistical significance at p < 0.05. Adjusted for baseline age, sex, education, monthly income, spouse, dwelling status, smoking, drinking, BMI, physical activities, intellectual activities, hypertension, diabetes, hyperlipidemia, coronary heart disease and cerebrovascular diseases.

**Abbreviations:** MIP, maximal inspiratory pressure; Z-, standardized score.

**Table S9** Association between MEP and cognitive scores and domains under sex stratification

|  |  | *β* | 95%*CI* | *t* | *P* |
| --- | --- | --- | --- | --- | --- |
| Male | Z-global | 0.158 | （0.072，0.243） | 3.633 | **＜0.001** |
| Z-memory | 0.090 | （0.003，0.176） | 2.043 | **0.042** |
| Z-language | 0.140 | （0.031，0.248） | 2.541 | **0.012** |
| Z-attention | 0.036 | （-0.039，0.111） | 0.950 | 0.343 |
| Z-execution | 0.173 | （0.086，0.260） | 3.928 | **＜0.001** |
| Female | Z-global | 0.184 | （0.087，0.280） | 3.723 | **＜0.001** |
| Z-memory | 0.130 | （0.034，0.226） | 2.667 | **0.008** |
| Z-language | 0.126 | （0.029，0.223） | 2.548 | **0.011** |
| Z-attention | 0.096 | （0.005，0.187） | 2.067 | **0.039** |
| Z-execution | 0.160 | （0.055，0.265） | 2.989 | **0.003** |

**Note:** All continuous variables (MEP) were included in the analysis after being standardized by z-score. Bold values indicate statistical significance at p < 0.05. Adjusted for baseline age, sex, education, monthly income, spouse, dwelling status, smoking, drinking, BMI, physical activities, intellectual activities, hypertension, diabetes, hyperlipidemia, coronary heart disease and cerebrovascular diseases.

**Abbreviations:** MEP, maximum expiratory pressure; Z-, standardized score.

**Table S10** Association of PF indices, RMS indices with the global domain of cognition by general linear regression model (excluded PF test quality < grade D)

|  | *β* | 95%*CI* | *t* | *P* |
| --- | --- | --- | --- | --- |
| PEF | 0.141 | (0.076, 0.207) | 4.246 | **＜0.001** |
| FEV1 | 0.100 | (0.008, 0.026) | 2.645 | **0.008** |
| FVC | 0.110 | (0.039, 0.181) | 3.026 | **0.003** |
| MIP | 0.066 | (-0.002, 0.133) | 1.996 | **0.046** |
| MEP | 0.159 | (0.094, 0.224) | 4.766 | **＜0.001** |

**Note:** All continuous variables ( PEF, FEV1, FVC, MIP and MEP) were included in the analysis after being standardized by z-score. Bold values indicate statistical significance at p < 0.05. Adjusted for baseline age, sex, education, monthly income, spouse, dwelling status, smoking, drinking, BMI, physical activities, intellectual activities, hypertension, diabetes, hyperlipidemia, coronary heart disease and cerebrovascular diseases.

**Abbreviations:** FEV1, forced expiratory volume in one second; FVC, forced vital capacity; PEF, peak expiratory flow; MIP, maximal inspiratory pressure; MEP, maximum expiratory pressure.

**Table S11** Association of PF indices, RMS indices with the global domain of cognition by general linear regression model (excluded extremely severe mixed ventilation dysfunction)

|  | *β* | 95% *CI* | *t* | *P* |
| --- | --- | --- | --- | --- |
| PEF | 0.154 | (0.084, 0.224) | 4.300 | **＜0.001** |
| FEV1 | 0.113 | (0.027, 0.199) | 2.577 | **0.010** |
| FVC | 0.106 | (0.033, 0.179) | 2.839 | **0.005** |
| MIP | 0.076 | (0.006, 0.145) | 2.139 | **0.033** |
| MEP | 0.175 | (0.105, 0.245) | 4.924 | **＜0.001** |

**Note:** All continuous variables ( PEF, FEV1, FVC, MIP and MEP) were included in the analysis after being standardized by z-score. Bold values indicate statistical significance at p < 0.05. Adjusted for baseline age, sex, education, monthly income, spouse, dwelling status, smoking, drinking, BMI, physical activities, intellectual activities, hypertension, diabetes, hyperlipidemia, coronary heart disease and cerebrovascular diseases.

**Abbreviations:** FEV1, forced expiratory volume in one second; FVC, forced vital capacity; PEF, peak expiratory flow; MIP, maximal inspiratory pressure; MEP, maximum expiratory pressure.

**Table S12** Association of PF indices, RMS indices with the global domain of cognition by general linear regression model (excluded participants with dementia)

|  | *β* | 95% *CI* | *t* | *P* |
| --- | --- | --- | --- | --- |
| PEF | 0.139 | (0.076, 0.202) | 4.307 | **＜0.001** |
| FEV1 | 0.106 | (0.034, 0.178) | 2.883 | **0.004** |
| FVC | 0.109 | (0.040, 0.178) | 3.100 | **0.002** |
| MIP | 0.071 | (0.006, 0.137) | 2.130 | **0.033** |
| MEP | 0.159 | (0.096, 0.223) | 4.939 | **＜0.001** |

**Note:** All continuous variables ( PEF, FEV1, FVC, MIP and MEP) were included in the analysis after being standardized by z-score. Bold values indicate statistical significance at p < 0.05. Adjusted for baseline age, sex, education, monthly income, spouse, dwelling status, smoking, drinking, BMI, physical activities, intellectual activities, hypertension, diabetes, hyperlipidemia, coronary heart disease and cerebrovascular diseases.

**Abbreviations:** FEV1, forced expiratory volume in one second; FVC, forced vital capacity; PEF, peak expiratory flow; MIP, maximal inspiratory pressure; MEP, maximum expiratory pressure.

**Table S13** Correlation analysis of blood markers with c-PF and cognitive function (N = 977)

|  | Association between biomarkers and c-PF | | Association between biomarkers and cognition | |
| --- | --- | --- | --- | --- |
|  | *r* | *P* | *r* | *P* |
| Inflammatory-related biomarkers | | | | |
| Leukocyte count | -0.035 | 0.281 | -0.049 | 0.124 |
| Percent of neutrophils | 0.016 | 0.617 | -0.024 | 0.447 |
| The absolute value of neutrophils | -0.021 | 0.520 | -0.048 | 0.138 |
| Percent of monocytes | 0.091 | **0.028** | 0.016 | 0.701 |
| The absolute value of monocytes | 0.040 | 0.208 | -0.003 | 0.935 |
| Percent of lymphocytes | -0.074 | **0.020** | 0.019 | 0.545 |
| The absolute value of lymphocytes | -0.088 | **0.006** | -0.026 | 0.418 |
| High-sensitivity C-reactive protein | -0.053 | 0.138 | -0.046 | 0.194 |
| Platelet count | -0.088 | **0.006** | 0.031 | 0.341 |
| Platelet volume distribution width | -0.005 | 0.881 | -0.022 | 0.485 |
| Plateletcrit | -0.115 | **＜0.001** | 0.019 | 0.563 |
| Percent of basophils | 0.080 | **0.012** | -0.017 | 0.587 |
| The absolute value of basophils | 0.053 | 0.101 | -0.053 | 0.096 |
| Percent of eosinophils | 0.124 | **＜0.001** | 0.010 | 0.748 |
| The absolute value of eosinophils | 0.108 | **0.001** | -0.010 | 0.748 |
| Erythrocyte-related biomarkers | | | | |
| Hematocrit | 0.286 | **＜0.001** | 0.052 | 0.108 |
| Red blood cell count | 0.255 | **＜0.001** | 0.015 | 0.629 |
| Average red blood cell volume | 0.020 | 0.532 | 0.045 | 0.161 |
| Average hemoglobin per red blood cell | 0.092 | **0.004** | 0.048 | 0.137 |
| Average hemoglobin concentration per red blood cell | 0.132 | **＜0.001** | 0.012 | 0.715 |
| Liver function-related biomarkers | | | | |
| Alanine aminotransferase | 0.035 | 0.269 | 0.017 | 0.593 |
| Aspartate aminotransferase | -0.032 | 0.312 | -0.007 | 0.837 |
| AST/ALT | -0.120 | **＜0.001** | -0.034 | 0.289 |
| Total bilirubin | 0.200 | **<0.001** | 0.078 | **0.026** |
| Globulin | -0.069 | **0.032** | -0.026 | 0.412 |
| Albumin | 0.043 | 0.175 | 0.076 | **0.018** |
| Total protein | -0.038 | 0.236 | 0.019 | 0.547 |
| Albumin/globulin ratio | 0.086 | **0.007** | 0.037 | 0.248 |
| Renal function-related biomarkers | | | | |
| Urea | -0.006 | 0.841 | -0.111 | **＜0.001** |
| Uric acid | 0.159 | **＜0.001** | 0.000 | 1.000 |
| Creatinine | 0.216 | **＜0.001** | -0.038 | 0.241 |
| PH | 0.014 | 0.654 | 0.034 | 0.292 |
| The specific gravity of urine | 0.039 | 0.229 | -0.001 | 0.969 |
| Metabolites | | | | |
| Homocysteine | 0.134 | **＜0.001** | -0.063 | 0.077 |
| Vitamin B12 | -0.128 | **＜0.001** | 0.052 | 0.147 |
| Folic acid | -0.075 | **0.044** | -0.001 | 0.972 |
| Total cholesterol | -0.101 | **0.002** | -0.044 | 0.170 |
| Fasting blood glucose | -0.027 | 0.391 | -0.109 | **0.001** |
| Low-density lipoprotein cholesterol | -0.037 | 0.248 | -0.032 | 0.322 |
| High-density lipoprotein cholesterol | -0.137 | **＜0.001** | 0.004 | 0.898 |
| Triglycerides | -0.039 | 0.222 | -0.024 | 0.453 |

**Abbreviations:** ALT, Alanine aminotransferase; AST, Aspartate aminotransferase; c-PF, comprehensive pulmonary function.

Bold values indicate statistical significance at p < 0.05.

**Table S14** Results of mediation effect analysis

|  | Cognition | | | | Total bilirubin | | | | Cognition | | | |
| --- | --- | --- | --- | --- | --- | --- | --- | --- | --- | --- | --- | --- |
|  | *β* | *SE* | *t* | *P* | *β* | *SE* | *t* | *P* | *β* | *SE* | *t* | *P* |
| c-PF | 0.3423 | 0.7889 | 4.3381 | **<0.0001** | 0.1561 | 0.0399 | 3.9123 | **0.0001** | 0.3194 | 0.0794 | 4.0230 | **0.0001** |
| Total bilirubin |  |  |  |  |  |  |  |  | 0.1457 | 0.0694 | 2.0990 | **0.0360** |
| R2 | 0.0229 | | | | 0.0186 | | | | 0.0282 | | | |
| F | 18.8580 | | | | 15.2700 | | | | 11.6760 | | | |

**Note:** Bold values indicate statistical significance at p < 0.05. Adjusted for baseline age, sex, education, monthly income, spouse, dwelling status, smoking, drinking, BMI, physical activities, intellectual activities, hypertension, diabetes, hyperlipidemia, coronary heart disease and cerebrovascular diseases.

**Abbreviations:** c-PF, comprehensive pulmonary function.

**Supplementary figures and their captions and legends**

**FigureS1** Flowchart.


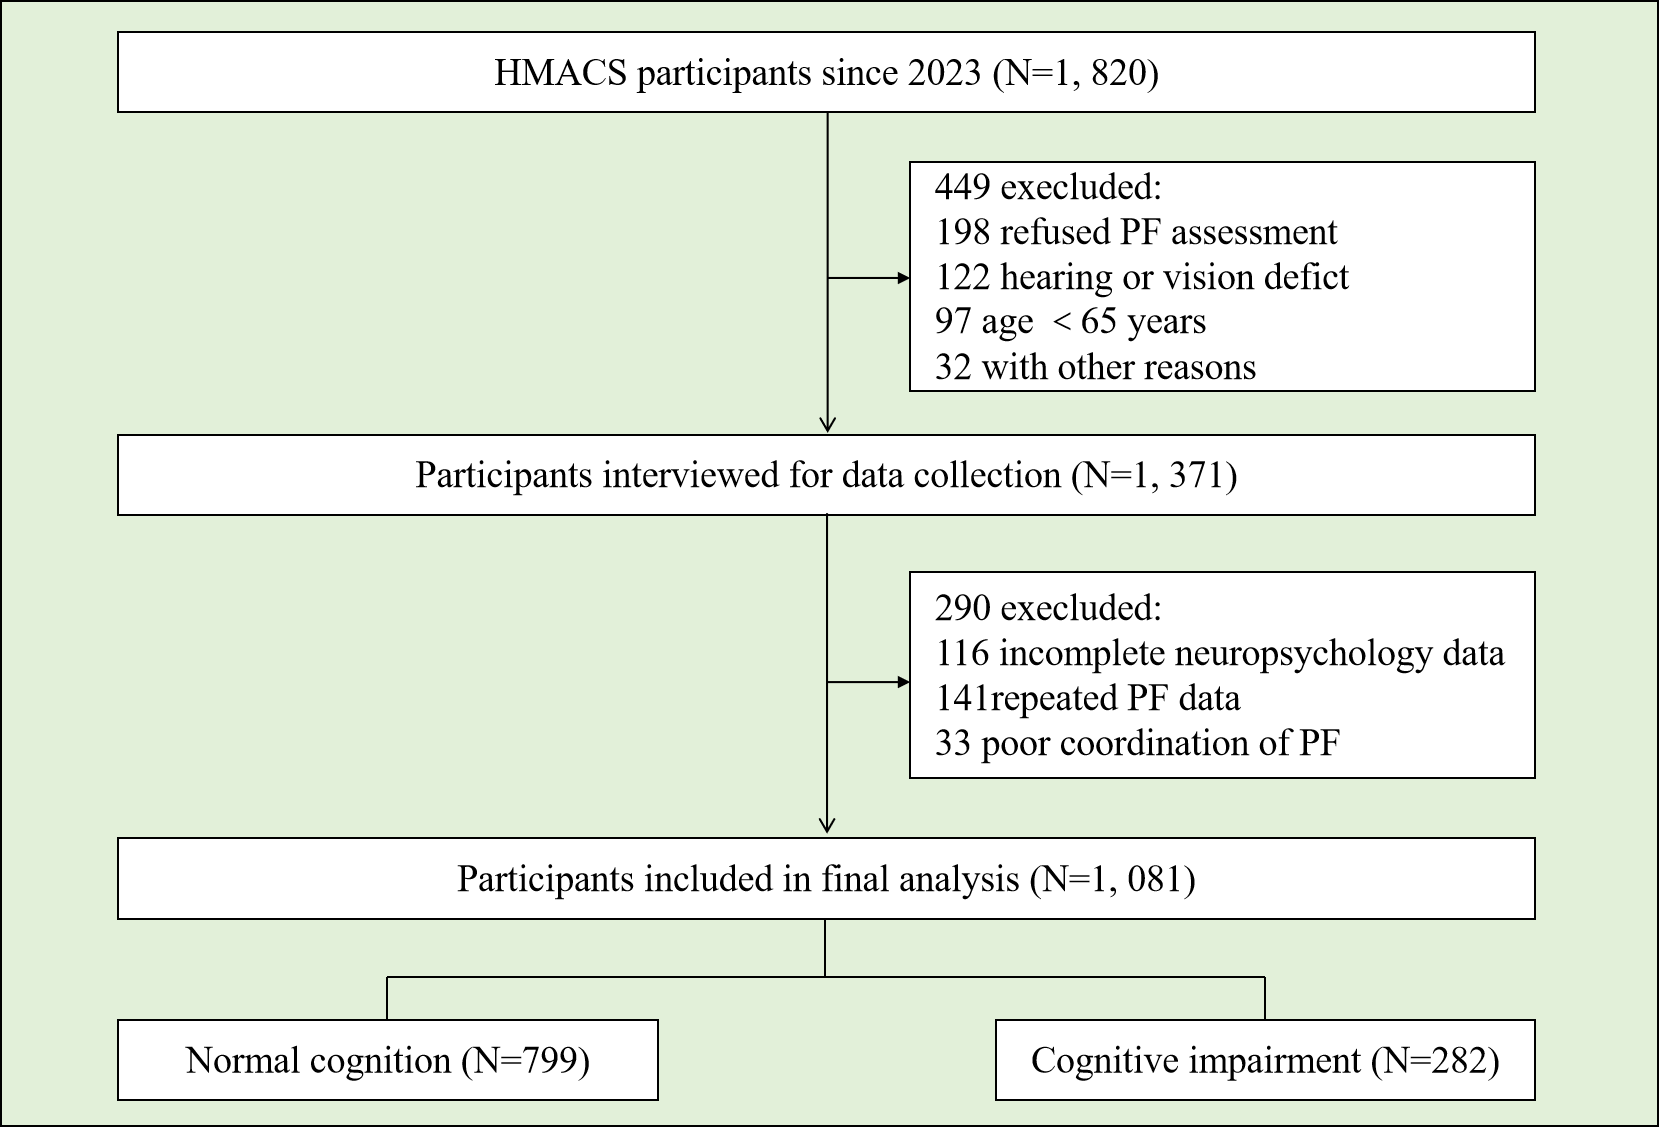


**Abbreviations:**HMACS, Hubei Memory and Aging Cohort Study.

**Figure S2** Subgroup analysis of the association between c-PF and cognitive impairment based on sex, age, and smoking


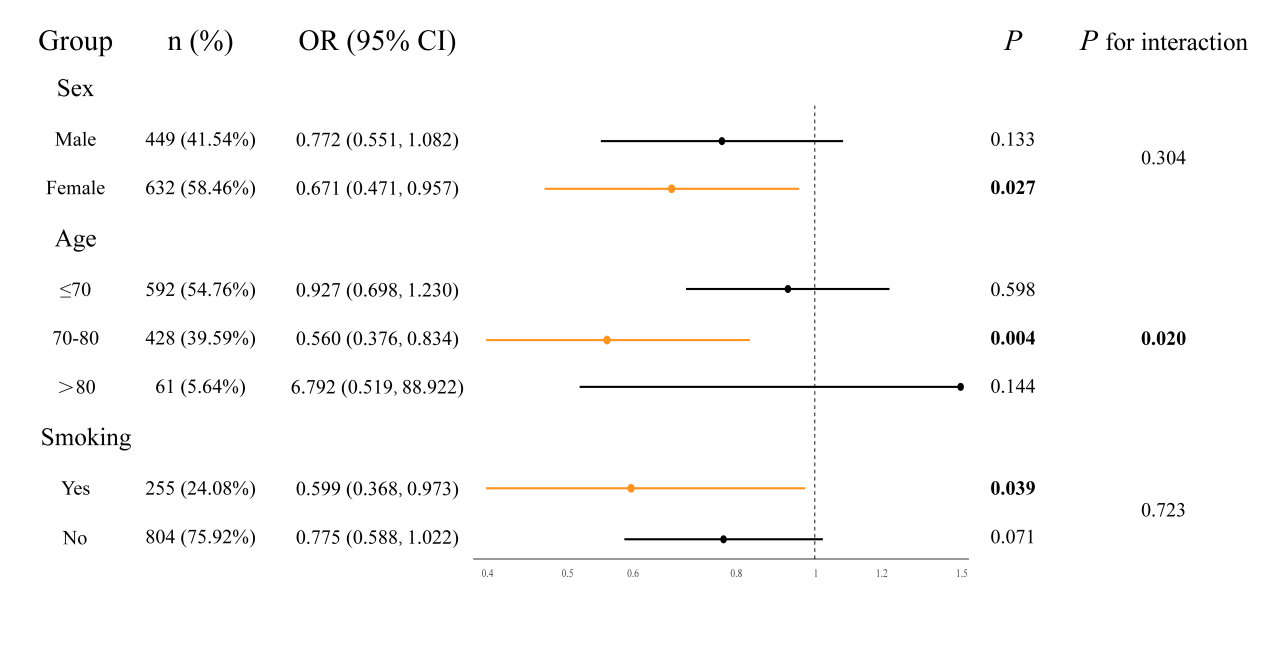


**Note:** Bold values indicate statistical significance at p < 0.05. Adjusted for baseline age, sex, education, monthly income, spouse, dwelling status, smoking, drinking, BMI, physical activities, intellectual activities, hypertension, diabetes, hyperlipidemia, coronary heart disease and cerebrovascular diseases.

**Abbreviations:** c-PF, comprehensive pulmonary function; OR, odd ratio; CI, confidence interval.

**Figure S3** Predicted probabilities of cognitive impairment by age group


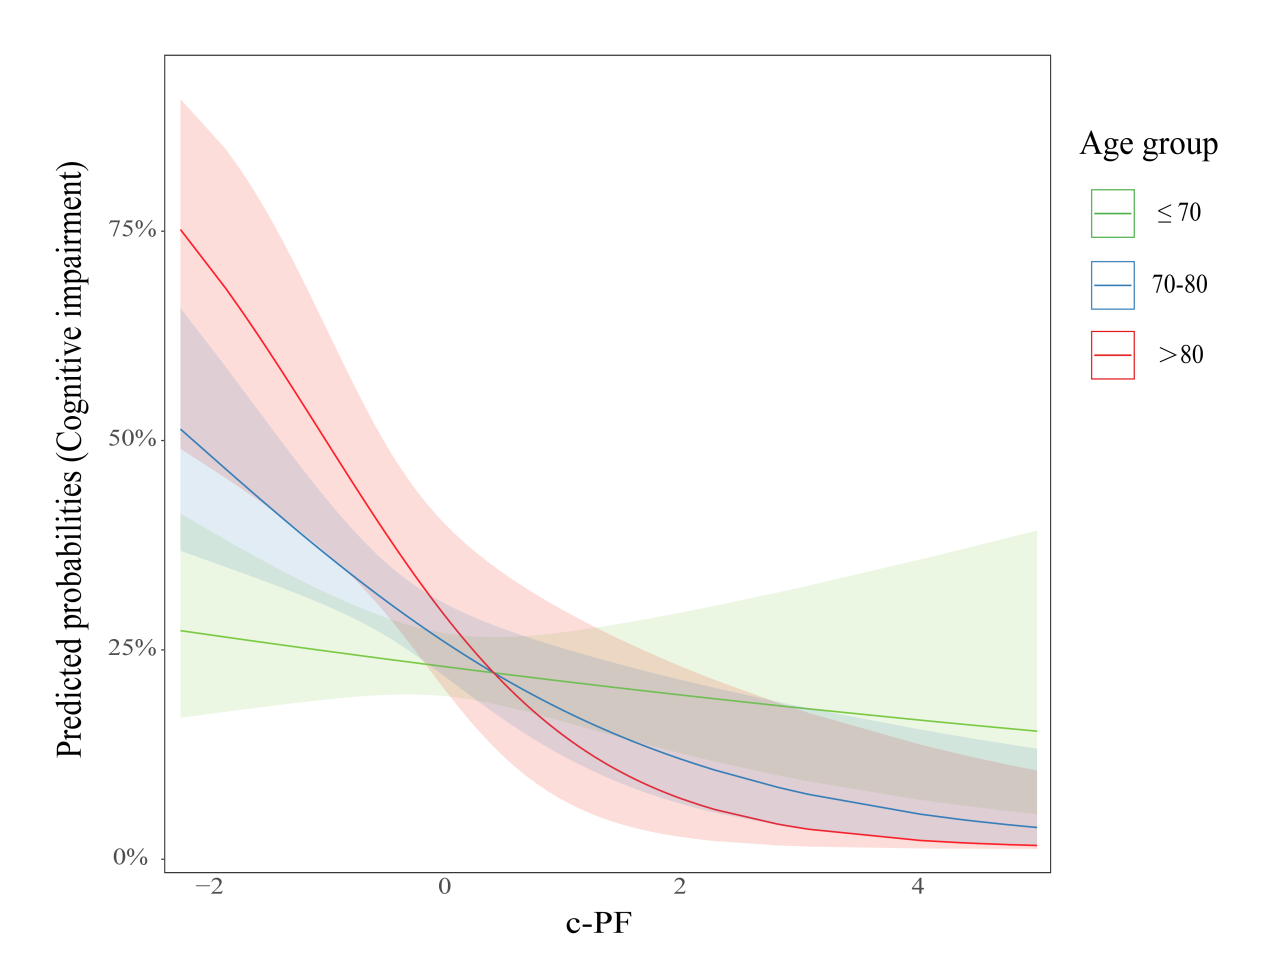


**Note:** All models are covariant baseline sex, education, income, spouse, dwelling status, smoking, drinking, BMI, physical activities, intellectual activities, hypertension, diabetes, hyperlipidemia, coronary heart disease and cerebrovascular diseases.
